# Supplementary material
Source: publisher site journal article supplement (https://www.dovepress.com/article/293698)
Supplement: Supplementary file 1 [file get_supplementary_file.php]

**Supplementary Figure 1** Annual changes in biosimilar penetration rate for each target disease by department from 2014 to 2018: **A**, rheumatoid arthritis. **B**, Crohn's disease. **C**, ulcerative colitis. **D**, psoriasis.

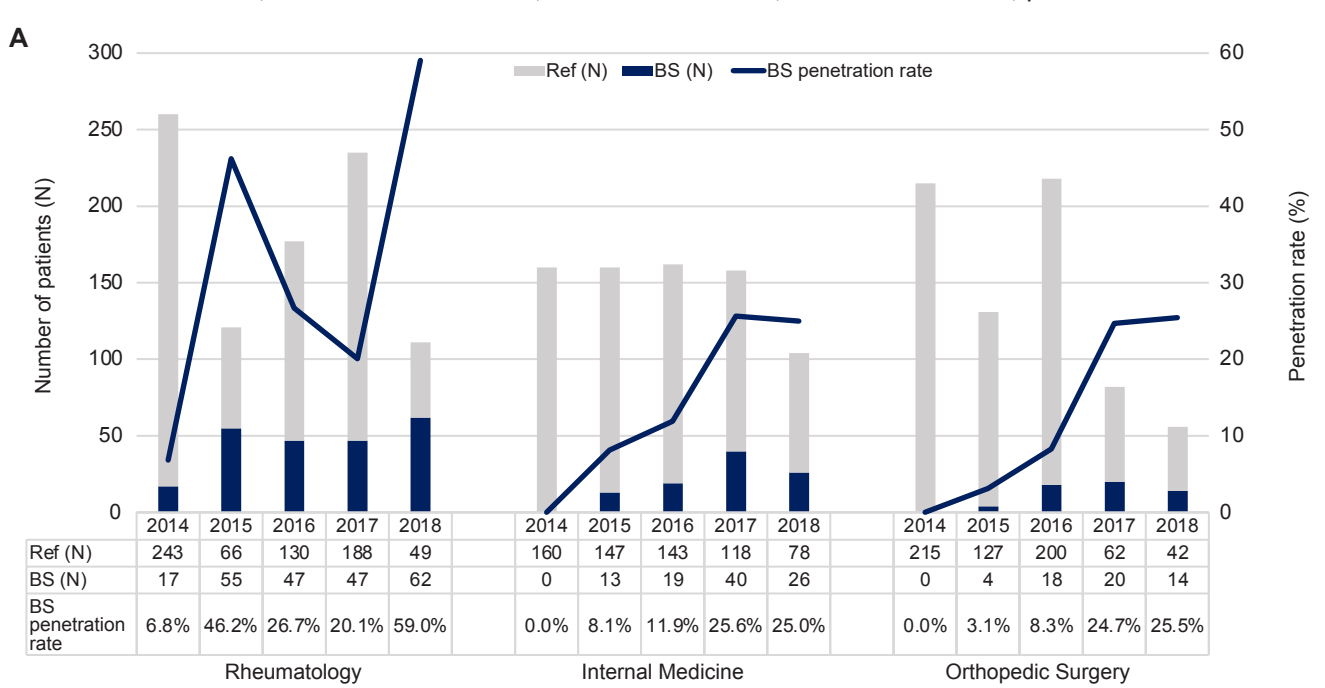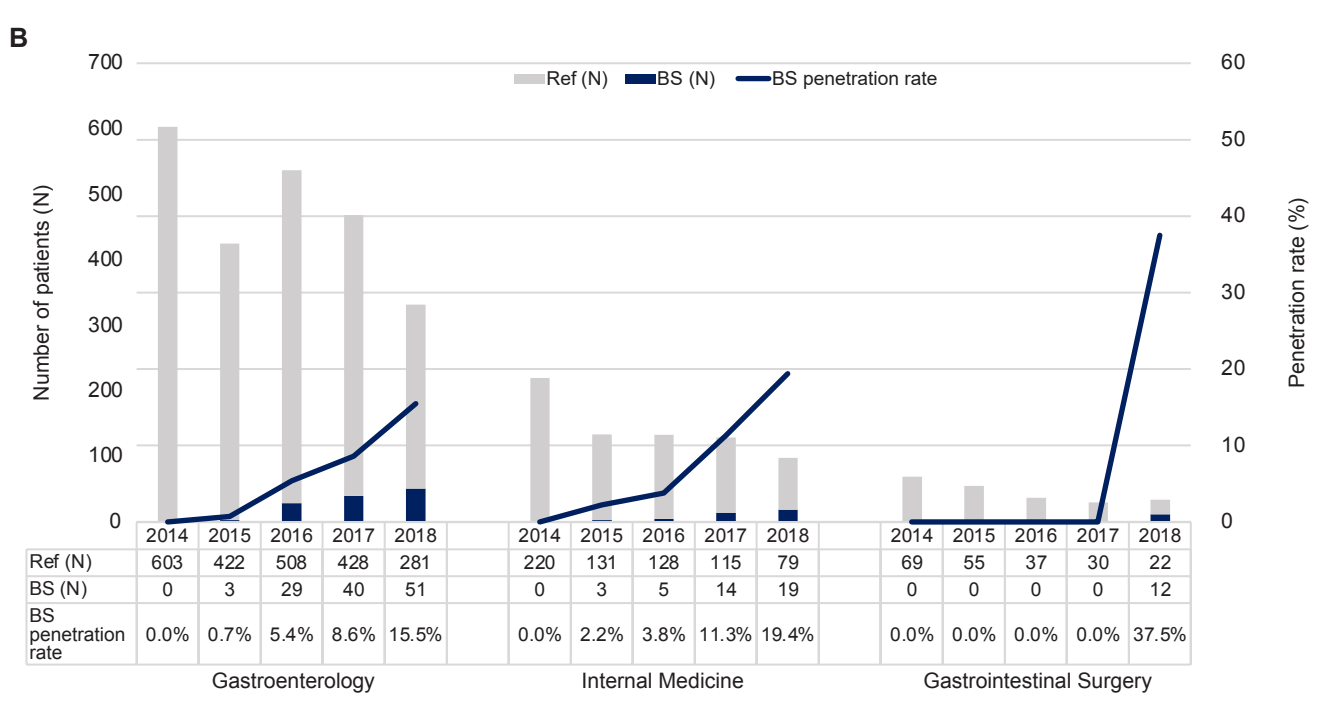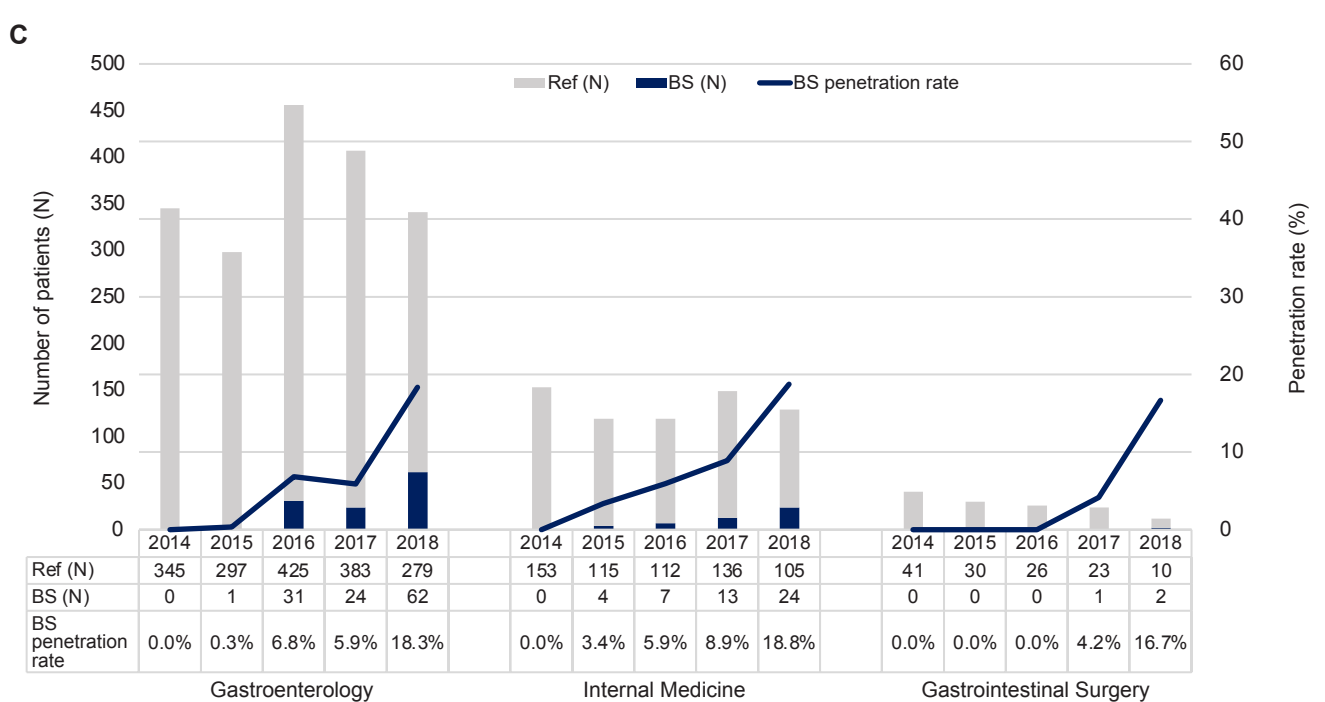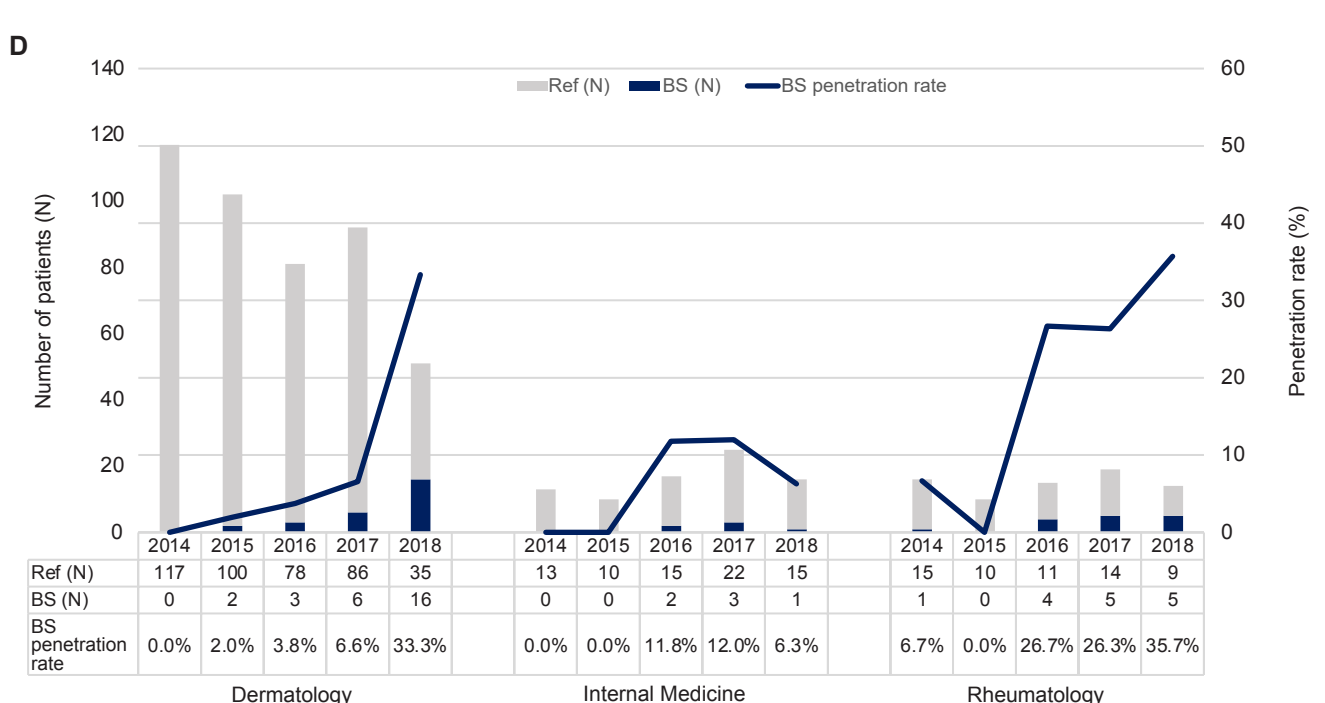

**Abbreviations:** Ref, reference product; BS, biosimilar; N, number of patients.
